# Supplementary material for: A Dystrophin Exon-52 Deleted Miniature Pig Model of Duchenne Muscular Dystrophy and Evaluation of Exon Skipping
Source: MDPI journal article supplement (doi:10.3390/ijms222313065), 2021-12-02
Supplement: s1 [file s1]

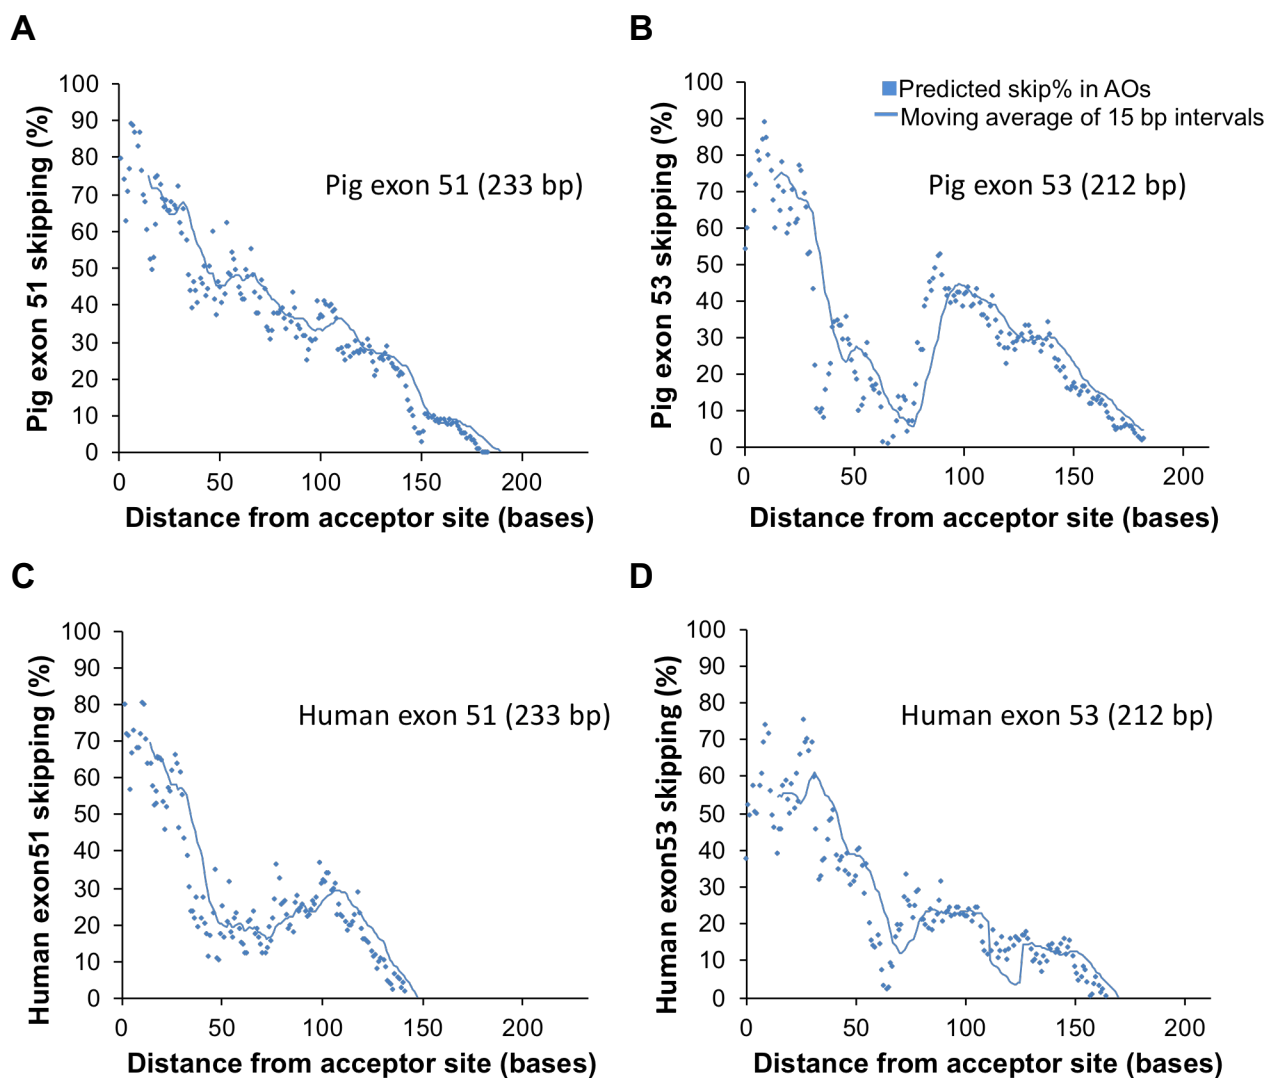

**Figure S1. Predictive efficiency of skipping pig *DMD* exon 51 (A) and exon 53 (B) using the in silico tool to design 30-mer PMOs [39].** A similar trend in skipping efficiency between pig and human exons was confirmed. The prediction of human exon 51 and 53 skipping efficiencies (C and D) was visualized for the present study adapted from our previous studies (Echigoya et al., [39] and [38], respectively).

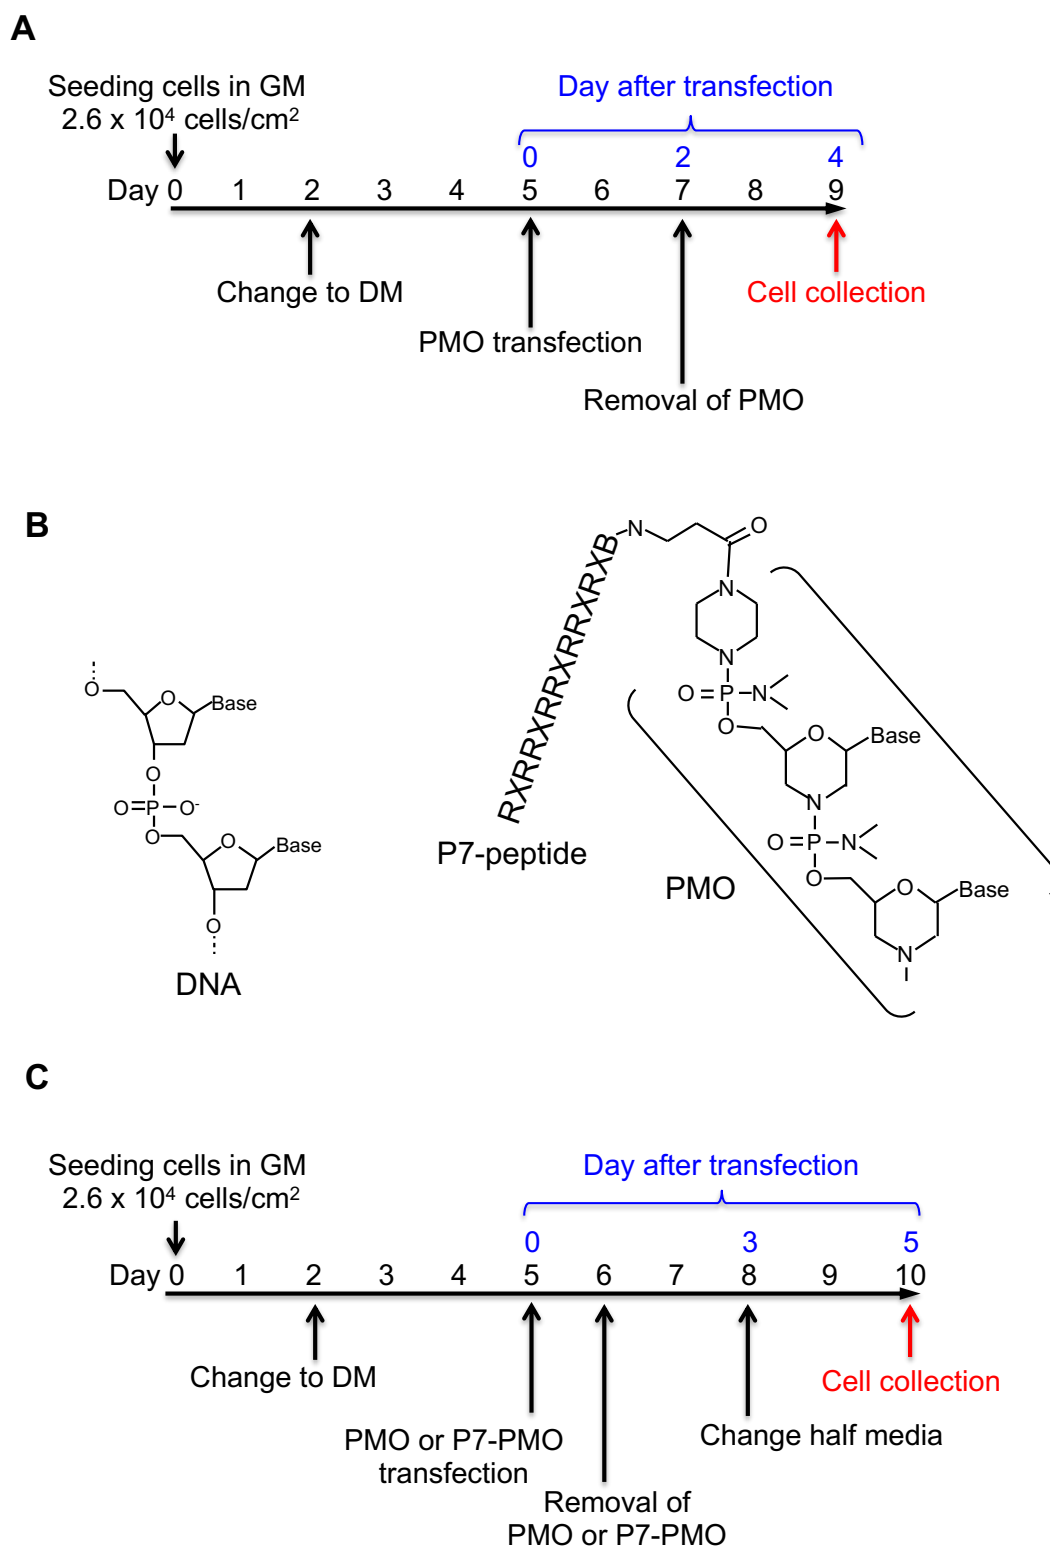

**Figure S2. Schematics of transfection conditions of primary DMD pig skeletal muscle cells in the screening test of PMOs at ten- $\mu$ M (A) and in the comparison of P7-peptide (B)-conjugated and unmodified PMOs (C) as shown in Fig. 6 and 7, respectively.** GM, growth media; DM, differentiation media. P7-PMO chemistry (right) compared to DNA chemistry (left): B,  $\beta$ -alanine; X, 6-aminohexanoic acid; R, L-arginine.

**A**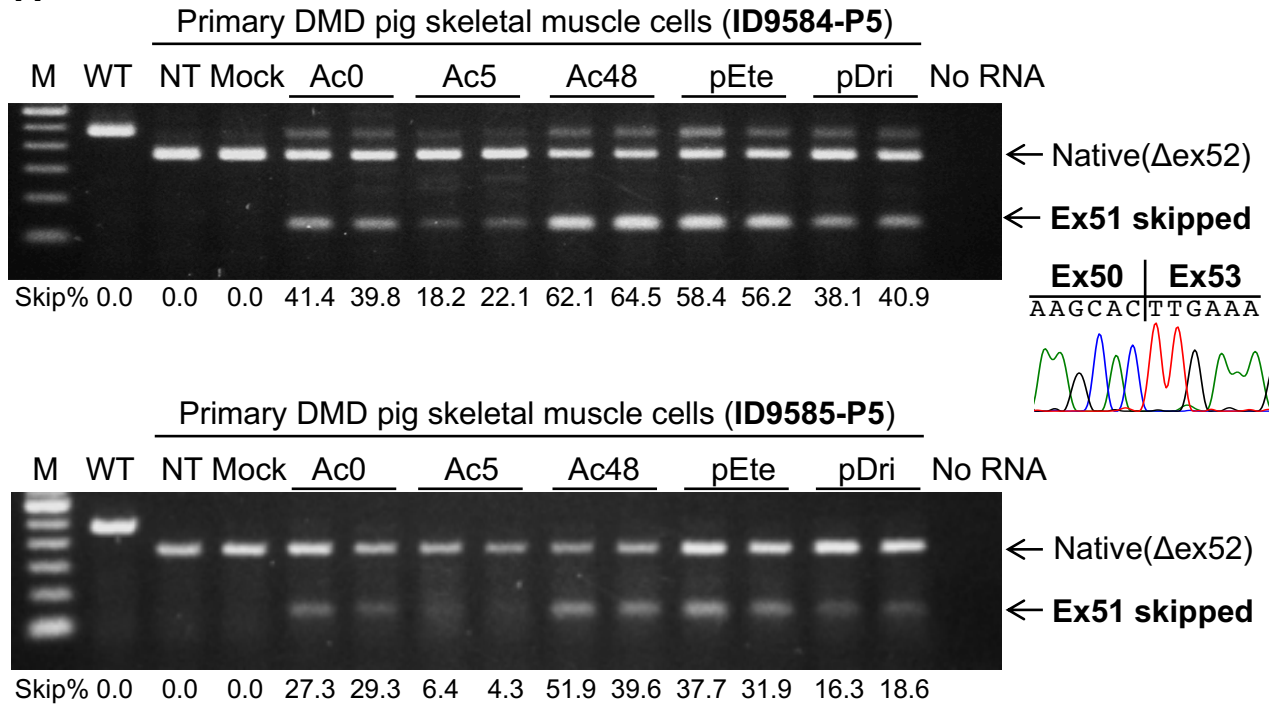**B**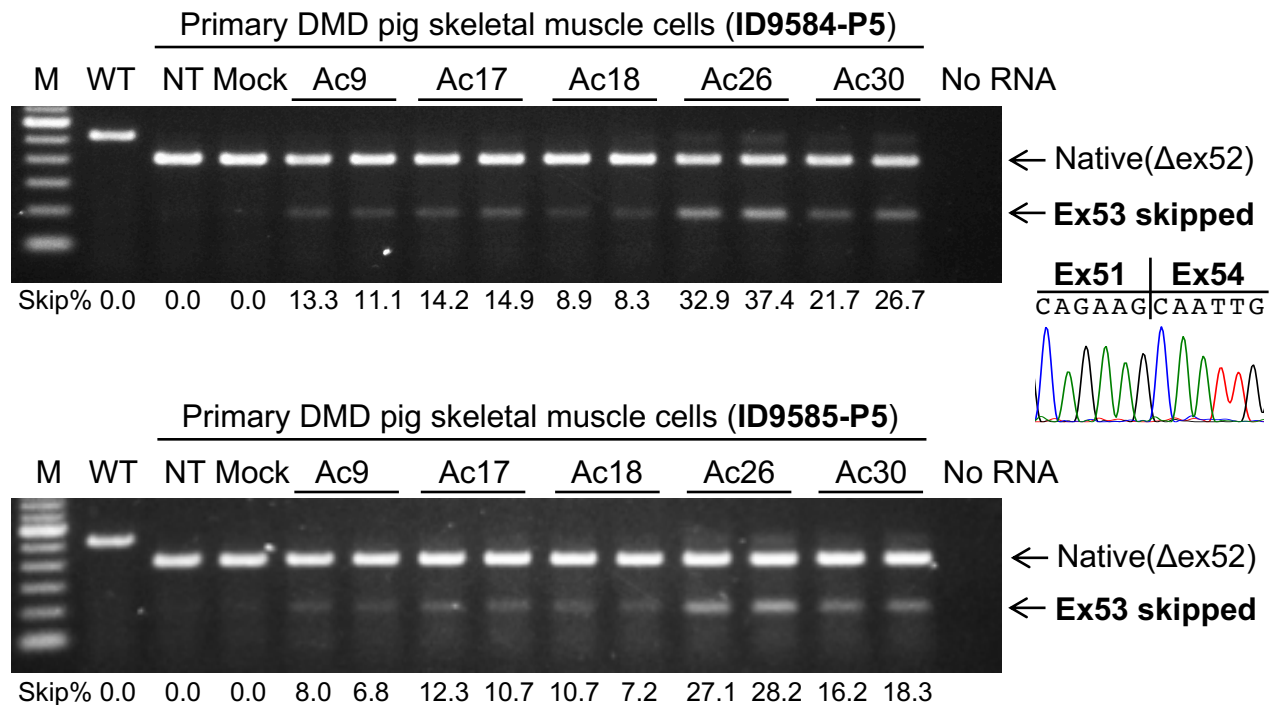

**Figure S3. Screening of the designed PMOs to skip exon 51 (A) or exon 53 (B) in the primary skeletal muscle cells derived from two affected male pigs (IDs 9584 and 9585).** Ten-μM PMOs were transfected to the DMD pig skeletal muscle cells (Fig. S2A). The percentage of the skipping efficiency was calculated with the following formula: Skip% = skipped band/(native and skipped bands) x 100. The exon junction as represented by colour waves was confirmed by direct sequencing. P5, passage number 5; M, 100 bp marker; WT, wild-type pig-derived primary skeletal muscle cells; NT, non-treated.; Ac, distance from Acceptor splice site.

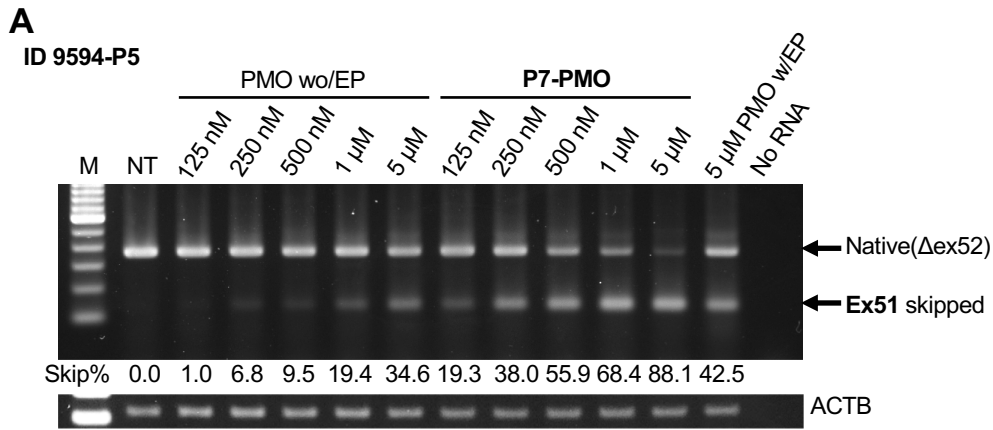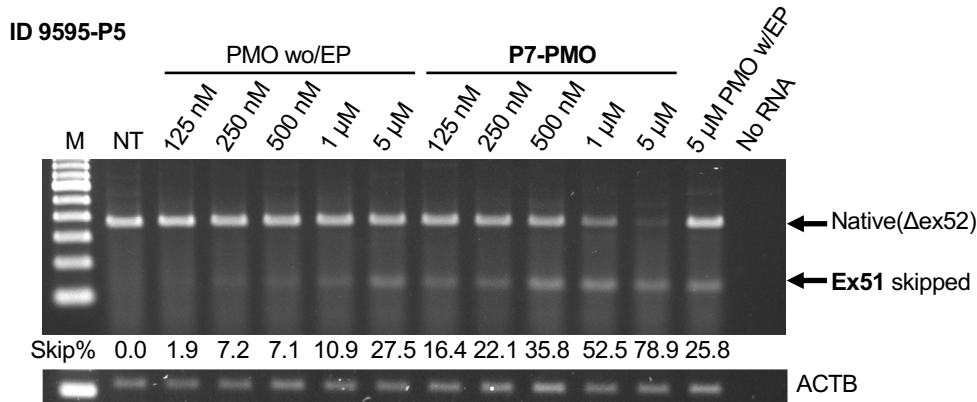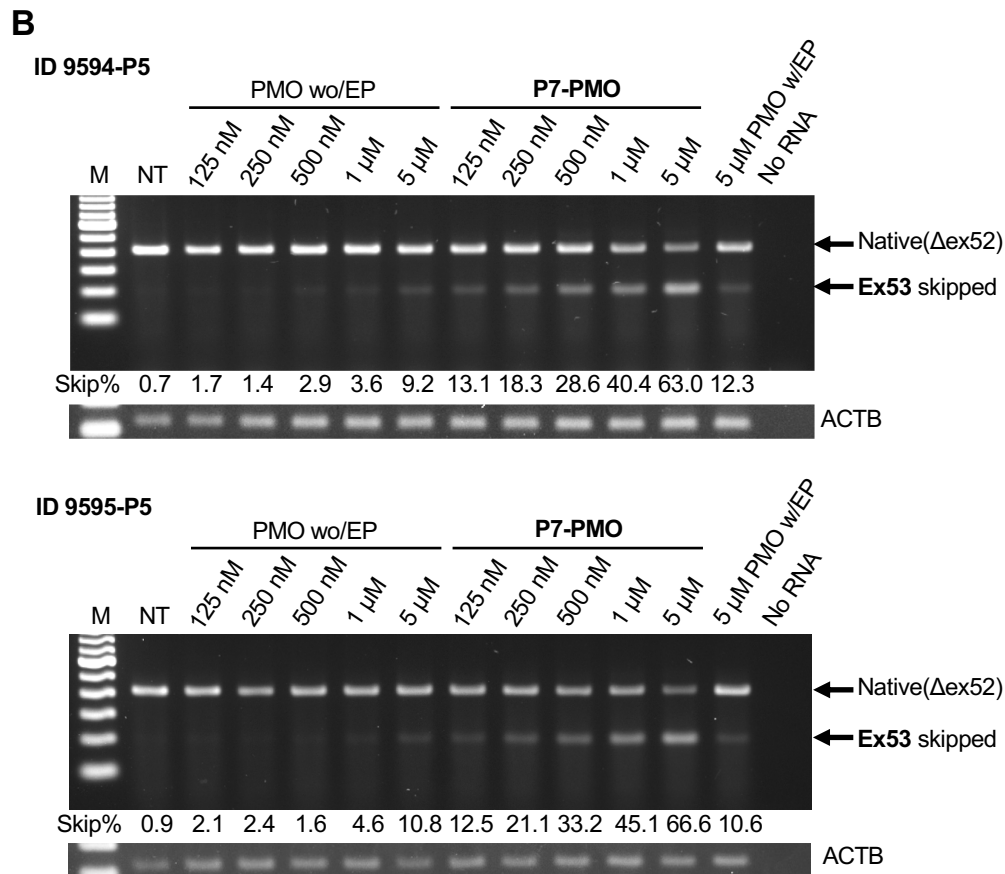

**Figure S4. *In vitro* efficacy of P7-peptide-conjugated PMOs composed of Ac48 and Ac26 sequences at skipping exon 51 (A) and exon 53 (B), respectively, in 2 different primary DMD pig skeletal muscle cells with the passage number 5 (P5) (IDs 9584 and 9585).** M, 100 bp marker; WT, wild-type pig-derived primary skeletal muscle cells; NT, non-treated; EP, a transfection reagent Endo-Porter peptide.

**Table S1. Information of pigs used in this study.**

|                        | ID          |             | Age euthanized | Used for                                                           |
|------------------------|-------------|-------------|----------------|--------------------------------------------------------------------|
| DMD <sup>ex52del</sup> | 4 stillborn | Littermates | NA             |                                                                    |
|                        | 9292        |             | 1 day          | Histology, CK measurement.                                         |
|                        | 9293        |             | 1 day          | Histology, CK measurement.                                         |
|                        | 9290        |             | 5 days         | Histology, CK measurement.                                         |
|                        | 9286        |             | 6.5 months     | Histology, CK measurement, Growth curve.                           |
|                        | 9291        |             | 7 months       | Histology, Growth curve.                                           |
|                        | 9584        | Littermates | 6 days         | Primary culture.<br>: Euthanized due to diminished body condition. |
|                        | 9585        |             | 6 days         | Primary culture<br>: Euthanized due to diminished body condition.  |
| Wild-type              | 11380       |             | 7 months       | Histology, CK measurement, Growth curve.                           |
|                        | 11384       |             | 8 months       | Histology, CK measurement, Growth curve.                           |
|                        | 11390       |             | 8 months       | Histology, CK measurement, Growth curve.                           |
|                        | 14425       |             | 8 days         | Primary culture.                                                   |
|                        | 14426       |             | 8 days         | Primary culture.                                                   |

**Table S2. PCR primers used in this study.**

| Purpose    | Name                    | Sequence (5' to 3')   |
|------------|-------------------------|-----------------------|
| Genotyping | DMD Geno C-F            | GATGGATATCTGCAGAATTCG |
|            | DMD Geno E-F            | AGCAATCAAGAAGCCAGAACA |
|            | DMD Geno F-F            | TGTGGAATGTGTGCGAGGC   |
|            | DMD Geno B-R            | CATTGCCATTGCTATGGTTCA |
| RT-PCR     | pigDMD_ex50_22-41_Fwd   | TCAGAGTGGAAGGCGGTAAC  |
|            | pigDMD_ex53_24-44_Rv    | AAGGTGTTCTTGGACCTCATC |
|            | pigDMD_ex51_171-191_Fwd | AAATCACAGAGGGTGATGGTG |
|            | pigDMD_ex54_116-136_Rv  | AGGAGGCATTGATGTTCTCTG |
|            | pigACTB_Fwd             | TCCCTGGAGAAGAGCTACGA  |
|            | pigACTB_Rv              | GATGCCTGGGTACATGGTG   |

**Table S3. Primary antibodies used in pig muscle tissues or cells.**

| Antigen                       | Company            | Catalog number | Dilution ratio for pig muscles |       |
|-------------------------------|--------------------|----------------|--------------------------------|-------|
|                               |                    |                | Western blot                   | IHC   |
| Human dystrophin rod domain   | Leica Microsystems | NCL-DYS1       | 1/100                          | 1/200 |
| Human dystrophin C-terminal   | Leica Microsystems | NCL-DYS2       | 1/200                          | 1/200 |
| Human dystrophin rod domain   | Abcam              | ab85302        |                                | 1/400 |
| Human dystrophin C-terminal   | Abcam              | ab15277        |                                | 1/400 |
| Mouse alpha 1-syntrophin      | Abcam              | ab11187        |                                | 1/200 |
| Rabbit alpha-sarcoglycan      | Leica Microsystems | NCL-a-SARC     | 1/100                          | 1/10  |
| Human beta-dystroglycan       | DSHB               | MANDAG2(7D11)  |                                | 1/5   |
| Human nitric oxide synthase 1 | Santa Cruz         | sc-8309        | 1/250                          | 1/5   |
|                               | Biotechnology      |                |                                |       |
| Human Utrophin                | Leica Microsystems | NCL-DRP2       |                                | 1/5   |
| Chicken alpha Tubulin         | Abcam              | ab7291         | 1/15000                        |       |
